# Supplementary material
Source: publisher figshare collection journal article supplement (https://gsapubs.figshare.com/ndownloader/files/22409676)
Supplement: Supplementary file 1 [file 22409676]

## Sheet: Sheet1
Pratt, J.R., Barbeau, D.L., Jr., Izykowski, T.M., Garver, J.I., and Emran, A., 2016, Sedimentary provenance of the Taza-Guercif Basin, South Rifean Corridor, Morocco: Implications for basin emergence: Geosphere, v. 12, doi:10.1130/GES01192.1.
Supplemental Table 1. Detrital zircon U-Pb data
Ras el Ksar Fm (Bab Stout)
TGB1				Ratios								Ages
#	U [ppm]	Th/U		207Pb/235U	2 s	206Pb/238U	2 s	rhod	207Pb/206Pb	2 s		206Pb/238U	2 s	207Pb/235U	2 s	207Pb/206Pb	2 s		%Conc
TGB1_2	166	0.0188324		0.797	0.043	0.0946	0.0031	0.26305	0.0616	0.0027		583	18	592	25	633	96		92.1011
TGB1_5	54	0.425532		0.93	0.12	0.0971	0.0028	0.38018	0.0712	0.0091		597	16	652	56	810	220		73.7037
TGB1_15	176	0.25641		2.045	0.053	0.1901	0.0043	0.38424	0.0803	0.0021		1121	23	1129	18	1196	52		93.7291
TGB1_16	621	0.0369004		0.744	0.026	0.0921	0.003	0.70521	0.0598	0.0017		568	18	564	15	596	60		95.302
TGB1_19	660	0.0715308		0.761	0.035	0.0893	0.0048	0.82035	0.0652	0.002		551	29	577	19	768	64		71.7448
TGB1_21	153	0.577367		13.65	0.38	0.508	0.014	0.82085	0.1936	0.003		2647	62	2723	26	2771	26		95.5251
TGB1_30	77	0.123609		6.53	0.2	0.3706	0.0089	0.58598	0.127	0.0031		2031	42	2047	27	2051	43		99.0249
TGB1_31	348	0.2079		0.832	0.029	0.0957	0.0025	0.58005	0.062	0.0017		589	15	614	16	664	58		88.7048
TGB1_34	62	-0.208333		3.99	0.48	0.283	0.021	0.40689	0.102	0.012		1600	110	1689	88	1790	120		89.3855
TGB1_36	89	0.274725		1.669	0.069	0.1646	0.0044	0.49199	0.0727	0.0025		982	24	994	26	1019	78		96.369
TGB1_37	206	0.370645		0.737	0.038	0.084	0.0023	0.37783	0.0636	0.0032		520	14	559	22	710	110		73.2394
TGB1_38	35.1	0.149701		6.56	0.24	0.356	0.011	0.61878	0.13	0.0038		1968	50	2049	33	2090	52		94.1627
TGB1_43	135	0.15625		0.913	0.043	0.1067	0.0032	0.55927	0.0617	0.0027		653	19	656	23	651	96		100.307
TGB1_45	201	0.339328		0.829	0.037	0.0924	0.0021	0.21052	0.0637	0.0026		570	13	611	20	728	81		78.2967
TGB1_46	553	0.191131		0.751	0.024	0.0908	0.0023	0.57917	0.06	0.0014		560	13	570	13	608	52		92.1053
TGB1_47	1251	0.0537634		0.352	0.015	0.0464	0.0018	0.65101	0.0538	0.0019		292	11	306	11	347	75		84.1499
TGB1_50	178	0.6035		0.745	0.039	0.0895	0.0022	0.18079	0.0594	0.003		552	13	563	23	577	99		95.6672
TGB1_51	275	0.442478		1.341	0.082	0.1386	0.0083	0.82145	0.0692	0.0022		843	45	858	36	893	65		94.4009
TGB1_55	187	0.374532		0.784	0.03	0.0944	0.0027	0.54442	0.06	0.002		581	16	589	17	588	71		98.8095
TGB1_56	282	0.0609756		0.751	0.033	0.0902	0.0029	0.54836	0.0597	0.0026		556	17	567	19	569	95		97.7153
TGB1_57	561	0.31348		5.31	0.15	0.3154	0.0083	0.89824	0.1217	0.0016		1766	40	1873	22	1987	23		88.8777
TGB1_59	186	0.121507		1.13	0.073	0.123	0.0073	0.81668	0.0671	0.0023		746	42	768	36	867	73		86.0438
TGB1_60	310	0.153374		0.803	0.026	0.0965	0.0025	0.58035	0.0603	0.0017		594	14	597	14	603	61		98.5075
TGB1_61	186	0.431965		0.905	0.036	0.0992	0.0029	0.49535	0.0664	0.0024		610	17	656	19	828	75		73.6715
TGB1_62	550	0.101937		0.801	0.024	0.0947	0.0024	0.72628	0.0606	0.0014		583	14	597	13	619	50		94.1842
TGB1_69	227.4	0.230947		1.641	0.06	0.1634	0.0043	0.72612	0.073	0.0015		975	24	987	23	1009	42		96.6303
TGB1_71	172	0.0555556		4.61	0.74	0.262	0.04	0.96508	0.1252	0.0067		1470	210	1690	160	2000	110		73.5
TGB1_72	94.8	0.394322		11.38	0.32	0.421	0.011	0.82007	0.1942	0.0033		2274	51	2566	25	2776	28		81.9164
TGB1_74	486	0.16835		0.828	0.028	0.0978	0.0023	0.66391	0.0599	0.0014		601	13	612	16	612	52		98.2026
TGB1_75	92.9	0.3663		0.721	0.035	0.0886	0.0021	0.31171	0.0601	0.0029		547	12	553	21	597	99		91.6248
TGB1_76	145.8	0.16835		1.426	0.046	0.1442	0.0046	0.40548	0.0702	0.0024		868	26	902	18	954	72		90.9853
TGB1_81	386	0.0840336		0.751	0.066	0.0877	0.0068	0.82951	0.0607	0.0033		541	41	569	41	590	120		91.6949
TGB1_82	90.4	0.185185		0.66	0.049	0.079	0.0026	0.61765	0.0602	0.004		490	15	510	30	560	140		87.5
TGB1_83	333	0.325733		5.37	0.14	0.326	0.0091	0.83167	0.1163	0.0016		1818	44	1878	22	1899	26		95.7346
TGB1_85	143	0.44484		1.397	0.068	0.1373	0.0041	0.60546	0.0719	0.0027		829	23	889	28	980	73		84.5918
TGB1_89	59	0.246853		0.565	0.05	0.0697	0.0021	0.38089	0.0577	0.005		434	12	450	33	490	180		88.5714
TGB1_91	557	0.159236		4.81	0.38	0.277	0.022	0.97343	0.1243	0.0021		1570	110	1764	70	2016	30		77.877
TGB1_92	395	0.236407		0.757	0.032	0.0888	0.0031	0.73184	0.0612	0.0018		548	18	571	19	645	64		84.9612
TGB1_93	362	0.17452		8.79	0.41	0.369	0.016	0.90903	0.1703	0.003		2023	74	2308	43	2558	29		79.0852
TGB1_94	240	0.137741		6.05	0.18	0.3423	0.0093	0.79209	0.1279	0.0022		1896	45	1984	25	2067	29		91.7271
TGB1_95	143	0.431034		17.43	0.57	0.496	0.015	0.90298	0.2555	0.0037		2591	66	2960	33	3217	23		80.5409
TGB1_96	222	0.22779		5.59	0.44	0.298	0.021	0.97593	0.1368	0.0024		1700	100	1925	66	2185	31		77.8032
TGB1_98	191	0.131406		3.68	0.14	0.2591	0.0079	0.61978	0.1027	0.0025		1484	41	1563	30	1678	42		88.4386
TGB1_99	200.3	0.19084		0.675	0.029	0.0852	0.0024	0.32664	0.0578	0.0026		527	14	522	18	517	94		101.934
TGB1_101	509	0.340832		0.757	0.021	0.0903	0.002	0.72695	0.0605	0.001		557	12	571	12	625	38		89.12
TGB1_102	605	0.0625		0.805	0.033	0.0934	0.0044	0.85658	0.064	0.0022		575	26	598	18	726	73		79.2011
TGB1_103	434	0.310945		0.767	0.03	0.0957	0.0024	0.64584	0.0598	0.0015		589	14	585	16	586	55		100.512
TGB1_105	269	0.00343643		0.845	0.043	0.0977	0.0033	0.69771	0.0629	0.0022		600	19	623	24	700	80		85.7143
TGB1_107	424	0.706215		0.787	0.04	0.0921	0.0027	0.03069	0.0616	0.0024		567	16	587	22	640	86		88.5938
TGB1_108	111.9	0.568182		0.58	0.035	0.0726	0.0031	0.4526	0.059	0.0035		455	19	466	22	550	120		82.7273
TGB1_112	80.6	0.29824		0.395	0.039	0.0542	0.0018	-0.1737	0.0545	0.0045		340	11	344	28	380	180		89.4737
TGB1_113	168.1	0.314663		5.17	0.12	0.3013	0.0073	0.79453	0.1257	0.0023		1697	36	1850	21	2035	32		83.3907
TGB1_115	246.4	0.2405		0.729	0.032	0.088	0.0022	0.31353	0.0602	0.0021		544	13	554	19	620	64		87.7419
TGB1_116	420	0.292398		5.32	0.2	0.316	0.014	0.87476	0.1232	0.0027		1765	68	1867	32	2005	40		88.0299
TGB1_117	243	0.308642		0.794	0.039	0.094	0.0023	0.53551	0.0623	0.0025		579	13	591	22	680	82		85.1471
TGB1_118	117.3	0.42735		0.593	0.047	0.0704	0.0016	0.18883	0.0607	0.0045		438.4	9.4	468	30	570	160		76.9123
TGB1_119	288	0.200642		2.592	0.086	0.217	0.0057	0.43671	0.0874	0.0019		1266	30	1296	24	1364	43		92.8152
TGB1_120	220	0.537634		1.1	0.046	0.1192	0.0028	0.60706	0.0672	0.0021		726	16	751	22	831	66		87.3646
TGB1_14	48	0.0114409		0.692	0.029	0.0748	0.0035	0.91351	0.0683	0.0013		465	21	532	17	880	37		52.8409
TGB1_29	0.53	0.0360691		3.8	0.51	0.0747	0.0067	0.15338	0.395	0.059		463	40	1670	120	3980	230		11.6332
TGB1_33	1.2	0.015383		0.82	0.3	0.076	0.012	0.53968	0.143	0.049		470	71	723	87	1890	530		24.8677
TGB1_44	32	0.0116667		0.86	0.22	0.081	0.016	0.77891	0.0704	0.0055		498	90	581	93	910	130		54.7253
TGB1_63	35	0.0131831		0.609	0.084	0.0568	0.0058	-0.17697	0.069	0.01		355	36	468	60	840	370		42.2619
TGB1_84	0.0086	0.13125		2.09	0.27	0.0138	0.0022	0.58388	1.1	0.15		88	14	1155	92	5620	350		1.56584
TGB1_87	7.4	0.029519		3.26	0.14	0.08	0.0035	0.43341	0.292	0.013		499	21	1473	32	3437	74		14.5185
TGB1_104	0.59	0.00970588		0.482	0.04	0.0653	0.002	0.302	0.0544	0.0044		408	12	396	28	370	170		110.27
TGB1_110	6.2	0.0111063		0.653	0.045	0.0742	0.0027	0.40165	0.0634	0.0042		461	16	512	29	690	150		66.8116
Tachrift Turbidites
TGB4				Ratios								Ages
#	U [ppm]	Th/U		207Pb/235U	2 s	206Pb/238U	2 s	rhod	207Pb/206Pb	2 s		206Pb/238U	2 s	207Pb/235U	2 s	207Pb/206Pb	2 s		%Conc
TGB4_1	555	0.0387297		25.4	0.91	0.565	0.016	0.80066	0.3203	0.0045		2886	67	3320	36	3570	21		80.8403
TGB4_2	213	0.0180832		1.62	0.12	0.1601	0.0079	0.8148	0.0742	0.0027		956	44	990	45	1032	73		92.6357
TGB4_3	40.4	0.443066		0.726	0.075	0.086	0.0043	-0.048643	0.0645	0.0068		532	25	556	42	660	230		80.6061
TGB4_4	65.6	0.580046		4.37	0.23	0.295	0.015	0.72774	0.1066	0.0036		1665	72	1709	45	1745	58		95.4155
TGB4_5	202	0.346021		0.766	0.056	0.0959	0.0042	0.69366	0.0597	0.0027		595	24	580	34	570	100		104.386
TGB4_6	93.7	0.417362		8.95	0.87	0.403	0.02	0.91165	0.1594	0.006		2176	93	2298	98	2476	60		87.8837
TGB4_9	638	0.422654		0.804	0.048	0.0925	0.0053	0.80459	0.0619	0.0022		570	31	596	27	659	75		86.4947
TGB4_10	668	0.0934579		0.893	0.038	0.0982	0.0048	0.82693	0.0656	0.002		603	28	646	20	783	64		77.0115
TGB4_12	221	0.409836		0.902	0.056	0.1009	0.0031	0.58041	0.0664	0.0032		620	18	649	30	790	100		78.481
TGB4_13	614	0.41876		0.846	0.052	0.0982	0.0037	0.73116	0.0626	0.0022		604	22	625	30	693	77		87.1573
TGB4_14	293	0.470588		0.748	0.034	0.0871	0.0027	0.69797	0.0614	0.0022		538	16	566	20	653	79		82.389
TGB4_20	125.3	0.549753		0.841	0.062	0.0954	0.0035	0.65175	0.0653	0.0035		587	21	622	33	780	110		75.2564
TGB4_21	65.8	3.61011		6.42	0.37	0.35	0.015	0.83317	0.1278	0.0028		1931	72	2026	51	2064	39		93.5562
TGB4_22	103.4	0.371609		2.19	0.14	0.1977	0.009	0.77765	0.0804	0.0024		1161	48	1182	41	1224	59		94.8529
TGB4_25	91.1	0.539374		0.763	0.061	0.0886	0.0045	0.36322	0.0605	0.0035		547	27	571	36	590	130		92.7119
TGB4_26	156.5	0.219298		1.048	0.056	0.1134	0.0033	0.64762	0.0667	0.0031		692	19	725	28	807	97		85.7497
TGB4_27	71.4	0.254453		6.44	0.4	0.363	0.018	0.85591	0.1264	0.0032		1992	84	2027	56	2053	42		97.0287
TGB4_28	340	0.396825		0.844	0.067	0.1022	0.005	0.85652	0.0633	0.0023		627	29	630	37	705	81		88.9362
TGB4_29	48.3	0.468823		0.797	0.08	0.0971	0.0047	0.13255	0.0611	0.0052		597	28	587	46	580	180		102.931
TGB4_30	405	0.292056		0.692	0.031	0.0859	0.0023	0.85351	0.0601	0.0015		531	13	533	19	611	49		86.9067
TGB4_31	233.4	0.626959		0.895	0.06	0.1009	0.0038	0.66594	0.0645	0.0033		620	22	654	29	750	100		82.6667
TGB4_32	392	0.41511		0.649	0.026	0.0793	0.0029	0.7506	0.0593	0.0016		492	17	507	16	570	58		86.3158
TGB4_33	347	0.26455		6.25	0.59	0.354	0.029	0.79382	0.1316	0.0063		1940	130	2001	83	2102	82		92.2931
TGB4_34	291	0.0439947		0.8	0.055	0.0974	0.0034	0.7909	0.0618	0.0027		599	20	600	29	671	88		89.2697
TGB4_35	156	0.310559		1.158	0.084	0.1274	0.0041	0.62761	0.0694	0.0031		773	23	776	41	948	93		81.5401
TGB4_36	263	0.396825		0.855	0.052	0.1019	0.004	0.8403	0.0625	0.0022		625	23	624	29	720	73		86.8056
TGB4_37	229	0.144446		0.941	0.059	0.1098	0.0034	0.75801	0.0641	0.0022		671	20	677	29	732	71		91.6667
TGB4_38	637	0.144718		0.409	0.029	0.0564	0.003	0.75002	0.0542	0.0024		353	18	347	21	380	100		92.8947
TGB4_39	417	0.101833		6.58	0.25	0.361	0.014	0.89533	0.1329	0.0025		1983	65	2053	34	2134	33		92.9241
TGB4_40	58.3	0.391543		0.892	0.099	0.1041	0.0064	0.67749	0.0652	0.0047		637	37	637	53	720	160		88.4722
TGB4_41	70.5	0.409668		0.914	0.078	0.1094	0.0042	0.58913	0.062	0.0047		669	24	653	42	710	170		94.2254
TGB4_43	112.2	0.519481		2.02	0.14	0.1951	0.0066	0.58933	0.0769	0.0033		1148	35	1127	46	1101	86		104.269
TGB4_44	170.4	0.22477		3.14	0.16	0.2511	0.0099	0.75757	0.0919	0.0025		1443	51	1437	40	1459	52		98.9034
TGB4_45	596	0.160772		0.626	0.043	0.0788	0.0029	0.83259	0.0577	0.0018		489	17	497	26	522	67		93.6782
TGB4_46	390	0.209996		3.28	0.21	0.26	0.013	0.8944	0.0932	0.0021		1490	65	1466	52	1496	44		99.5989
TGB4_47	318	0.0564972		0.809	0.047	0.0989	0.0035	0.84111	0.06	0.002		608	20	599	27	593	72		102.53
TGB4_49	254	0.21645		6.89	0.35	0.385	0.015	0.82276	0.1279	0.0028		2097	71	2101	41	2066	39		101.5
TGB4_50	244.9	0.727273		0.834	0.058	0.1008	0.004	0.73588	0.0606	0.0026		619	24	618	35	623	95		99.3579
TGB4_51	84	0.250627		7.04	0.3	0.384	0.016	0.57945	0.1306	0.0036		2090	73	2111	38	2110	46		99.0521
TGB4_52	156.1	0.645161		1.63	0.13	0.1544	0.0066	0.75614	0.0754	0.0033		925	37	996	42	1059	91		87.3466
TGB4_53	419	0.249377		0.871	0.037	0.101	0.0041	0.84533	0.0606	0.0014		620	24	635	20	619	49		100.162
TGB4_54	287	1.57729		0.887	0.064	0.0968	0.0045	0.67243	0.0659	0.0035		595	26	641	35	780	110		76.2821
TGB4_55	206.4	0.459982		0.826	0.061	0.0971	0.0038	0.36626	0.0615	0.0033		597	23	607	34	630	120		94.7619
TGB4_56	58.4	0.305998		2.36	0.16	0.203	0.0067	0.73673	0.0835	0.0035		1191	36	1231	47	1264	82		94.2247
TGB4_57	119.5	0.649351		6.45	0.3	0.362	0.015	0.83231	0.1234	0.0022		1989	71	2032	43	2004	31		99.2515
TGB4_58	45.7	0.334336		1.077	0.08	0.1205	0.005	0.41023	0.0683	0.0059		733	29	755	41	890	160		82.3596
TGB4_60	233	0.607165		0.918	0.047	0.1064	0.0041	0.67048	0.0656	0.0026		651	24	659	25	778	82		83.6761
TGB4_63	557	0.269542		16.17	0.78	0.569	0.024	0.94499	0.2056	0.0033		2900	100	2878	52	2874	27		100.905
TGB4_64	351	0.390016		0.279	0.02	0.0414	0.0014	0.66364	0.051	0.0025		261.8	8.4	249	16	250	110		104.72
TGB4_67	172.2	0.210084		2.145	0.089	0.1998	0.0052	0.73015	0.079	0.0024		1174	28	1161	29	1179	56		99.5759
TGB4_68	99	0.22779		1.65	0.14	0.1587	0.0087	0.76548	0.0757	0.0037		948	48	981	54	1063	99		89.1816
TGB4_69	326	0.521921		1.388	0.06	0.1468	0.0037	0.81875	0.0681	0.002		883	21	882	26	874	57		101.03
TGB4_70	924	0.657462		0.839	0.033	0.1	0.0021	0.94401	0.06181	0.00094		614	12	617	19	665	32		92.3308
TGB4_74	217	0.106383		12.37	0.78	0.468	0.018	0.79914	0.1937	0.0038		2474	79	2626	60	2772	32		89.2496
TGB4_75	52.4	0.202429		7.99	0.33	0.422	0.011	0.72892	0.1365	0.0042		2270	48	2225	37	2176	54		104.32
TGB4_76	96.1	0.747384		0.842	0.074	0.0987	0.0046	0.33099	0.0632	0.0043		606	27	614	41	670	140		90.4478
TGB4_79	271	0.225785		2.41	0.13	0.2084	0.0064	0.82554	0.084	0.0017		1220	34	1250	36	1290	39		94.5736
TGB4_80	200	0.273224		0.807	0.076	0.0915	0.004	0.36643	0.0647	0.0046		564	23	594	41	720	140		78.3333
TGB4_81	424	0.601323		0.636	0.028	0.0787	0.0028	0.72868	0.0601	0.0027		488	17	499	17	605	93		80.6612
TGB4_82	279.5	0.689655		11.78	0.51	0.458	0.015	0.82608	0.182	0.0031		2430	65	2581	42	2669	28		91.0453
TGB4_84	225	0.385802		1.62	0.1	0.1613	0.0057	0.87161	0.073	0.0021		964	32	981	38	1017	55		94.7886
TGB4_87	109	0.0625391		8.42	0.52	0.425	0.018	0.81752	0.1435	0.0034		2281	82	2265	57	2275	42		100.264
TGB4_90	272	0.543478		11.04	0.69	0.421	0.019	0.84322	0.1898	0.0041		2262	88	2514	60	2744	35		82.4344
TGB4_94	443	0.368053		6.28	0.3	0.355	0.017	0.87378	0.1236	0.0028		1957	80	2019	40	2005	39		97.606
TGB4_95	113.6	0.178891		0.852	0.097	0.0921	0.0068	0.79445	0.0654	0.0037		567	40	626	49	780	120		72.6923
TGB4_96	690	0.415455		0.784	0.039	0.0857	0.0029	0.72276	0.0637	0.002		530	17	591	24	721	69		73.509
TGB4_97	41.1	0.618429		4.59	0.34	0.286	0.012	0.61312	0.1104	0.007		1617	62	1732	65	1770	120		91.3559
TGB4_100	388	0.453515		1.61	0.099	0.1497	0.0042	0.79092	0.0729	0.0023		899	23	968	39	1015	66		88.5714
TGB4_61	302	0.397298		0.823	0.035	0.0784	0.0025	0.67492	0.0757	0.0025		486	15	608	20	1090	71		44.5872
TGB4_83	478	0.643915		0.576	0.036	0.0688	0.0033	0.70308	0.0601	0.0019		428	20	460	23	636	63		67.2956
TGB4_86	523	0.178253		0.408	0.02	0.0443	0.0016	0.48111	0.0666	0.0022		279.5	9.7	351	13	816	67		34.2525
TGB4_89	45.1	0.62461		3.69	0.27	0.0677	0.0025	0.61071	0.377	0.02		422	15	1558	58	3819	83		11.05
Gypsiferous Marl
TGB5				Ratios								Ages
#	U [ppm]	Th/U		207Pb/235U	2 s	206Pb/238U	2 s	rhod	207Pb/206Pb	2 s		206Pb/238U	2 s	207Pb/235U	2 s	207Pb/206Pb	2 s		%Conc
TGB5_1	275	0.189394		1.462	0.063	0.1463	0.0079	0.94588	0.0711	0.0017		879	45	912	27	954	50		92.1384
TGB5_2	249	0.280348		1.144	0.04	0.1273	0.0045	0.64407	0.0654	0.0018		772	26	773	19	778	60		99.2288
TGB5_3	501	0.0683995		7.21	0.29	0.388	0.018	0.85907	0.1319	0.0025		2108	85	2133	37	2120	33		99.434
TGB5_5	185	0.330033		12.93	0.38	0.51	0.011	0.91207	0.1814	0.0021		2656	49	2672	28	2664	19		99.6997
TGB5_6	107.2	0.442282		7.31	0.25	0.389	0.013	0.72059	0.1337	0.0033		2116	60	2146	31	2150	41		98.4186
TGB5_9	679	0.104603		1.683	0.083	0.1548	0.007	0.91565	0.0763	0.0014		927	39	1004	32	1099	37		84.3494
TGB5_10	126.1	0.480769		0.924	0.063	0.1033	0.0039	0.6199	0.0657	0.0034		633	23	673	33	810	110		78.1481
TGB5_12	393	0.0161031		0.74	0.034	0.0856	0.0043	0.70424	0.0614	0.0021		534	24	565	19	656	77		81.4024
TGB5_14	282	0.147059		0.821	0.04	0.0941	0.0029	0.83322	0.0638	0.002		580	17	607	22	737	68		78.6974
TGB5_16	169	0.0883392		0.725	0.024	0.0889	0.0019	0.32544	0.0594	0.0019		549	11	553	14	584	68		94.0068
TGB5_17	283.6	0.623053		0.848	0.033	0.1016	0.0023	0.36533	0.0612	0.0021		624	14	629	18	665	72		93.8346
TGB5_18	172.9	0.381679		0.786	0.025	0.0972	0.0013	0.1546	0.0598	0.002		598	7.7	588	14	594	76		100.673
TGB5_19	157	0.350877		0.708	0.043	0.0853	0.0035	0.59958	0.0617	0.0025		528	21	541	26	645	90		81.8605
TGB5_21	93.2	0.598444		9.84	0.18	0.4517	0.0084	0.60798	0.16	0.0026		2402	37	2419	17	2454	27		97.881
TGB5_22	443	0.0899281		1.922	0.062	0.1858	0.0065	0.8573	0.0756	0.0012		1098	35	1087	22	1090	35		100.734
TGB5_23	56	0.593824		0.86	0.051	0.0952	0.0019	0.15906	0.0661	0.0038		586	11	627	27	800	130		73.25
TGB5_24	76.3	0.44603		4.64	0.16	0.3095	0.0085	0.54495	0.1105	0.0033		1737	42	1758	29	1799	55		96.5536
TGB5_26	339	0.259538		5.343	0.084	0.3345	0.0062	0.84268	0.1162	0.0011		1859	30	1875	13	1897	18		97.9968
TGB5_28	45	0.198807		6.24	0.24	0.3404	0.0074	0.69454	0.1323	0.0034		1888	36	2005	35	2123	47		88.9308
TGB5_29	500	0.362188		0.853	0.025	0.0946	0.0018	0.46202	0.064	0.0016		583	10	625	14	746	50		78.1501
TGB5_30	65.5	0.406504		0.831	0.049	0.0939	0.002	0.26748	0.0631	0.0036		578	12	612	27	680	120		85
TGB5_31	169.8	0.16714		0.809	0.029	0.0957	0.0019	0.38931	0.059	0.002		589	11	601	16	574	68		102.613
TGB5_33	59.6	0.490196		18.87	0.4	0.591	0.013	0.77965	0.2253	0.0031		2990	51	3033	21	3018	22		99.0722
TGB5_35	262	0.119048		1.555	0.04	0.1486	0.0024	0.47233	0.0723	0.0017		893	14	951	16	997	45		89.5687
TGB5_36	98	0.13245		0.872	0.076	0.092	0.0057	0.7302	0.0618	0.0036		567	34	637	43	660	120		85.9091
TGB5_38	63.5	0.232558		6.53	0.18	0.347	0.008	0.57345	0.1288	0.0031		1919	38	2048	25	2086	44		91.9942
TGB5_39	28.1	0.704225		8.13	0.73	0.35	0.031	0.9493	0.1618	0.0059		1920	150	2225	87	2467	61		77.8273
TGB5_42	90.9	0.268097		20.75	0.73	0.563	0.019	0.88751	0.2549	0.0047		2876	78	3123	34	3219	27		89.3445
TGB5_43	99	0.374532		4.87	0.65	0.267	0.034	0.97209	0.1266	0.0029		1510	170	1750	110	2047	40		73.7665
TGB5_44	257	0.192308		5.05	0.2	0.293	0.01	0.94843	0.1205	0.0026		1656	51	1824	36	1960	38		84.4898
TGB5_45	241	0.361011		2.959	0.067	0.2301	0.0045	0.65219	0.0908	0.0015		1335	23	1400	16	1447	32		92.2598
TGB5_46	76.1	0.324359		1.429	0.072	0.1479	0.0042	0.5799	0.0695	0.0027		889	23	904	29	897	83		99.1081
TGB5_47	115.2	0.201613		16	0.41	0.534	0.012	0.79207	0.2127	0.0035		2757	51	2875	25	2925	27		94.2564
TGB5_49	69	0.638978		0.86	0.061	0.0929	0.0033	0.29534	0.066	0.0046		572	19	639	33	780	150		73.3333
TGB5_50	89	0.395101		0.712	0.038	0.0854	0.0015	0.33958	0.0599	0.003		528.4	8.7	544	22	610	110		86.623
TGB5_51	194.2	0.045045		0.887	0.025	0.1018	0.0019	0.36948	0.0617	0.0021		625	11	644	14	662	74		94.4109
TGB5_52	39.8	0.494805		1.575	0.089	0.1613	0.0036	0.38761	0.0698	0.0041		964	20	962	37	930	110		103.656
TGB5_53	462	0.357015		0.948	0.031	0.1086	0.0029	0.70114	0.0625	0.0013		664	17	676	16	688	46		96.5116
TGB5_56	46	0.351741		0.704	0.061	0.0871	0.0026	0.46806	0.0594	0.0043		538	15	536	36	560	160		96.0714
TGB5_57	269	0.156986		2.629	0.07	0.2007	0.0034	0.42763	0.0946	0.0025		1179	18	1307	20	1513	50		77.9247
TGB5_59	142	0.469484		0.707	0.032	0.0871	0.0029	0.14576	0.0591	0.0031		538	17	542	19	610	110		88.1967
TGB5_60	77.3	0.234192		8.27	0.28	0.4	0.0091	0.75694	0.1479	0.0032		2168	42	2257	31	2325	36		93.2473
TGB5_61	161.9	0.570776		0.788	0.03	0.0942	0.0024	0.16845	0.0609	0.0024		580	14	589	17	619	86		93.6995
TGB5_63	118	0.980392		0.859	0.051	0.1039	0.0054	0.73264	0.0598	0.0029		637	32	633	29	610	100		104.426
TGB5_64	153.1	0.210305		3.416	0.087	0.2603	0.0071	0.72136	0.0954	0.0022		1490	36	1511	18	1547	39		96.3154
TGB5_65	201.6	0.219346		2.345	0.042	0.2119	0.0027	0.096686	0.0806	0.0015		1239	14	1226	13	1215	39		101.975
TGB5_67	259.2	0.670241		7.03	0.31	0.3754	0.0083	0.85485	0.1352	0.0033		2054	39	2109	39	2162	42		95.0046
TGB5_68	166	0.578035		0.753	0.043	0.0885	0.0026	0.71418	0.0634	0.0023		546	16	567	25	707	79		77.2277
TGB5_69	103.7	0.15674		0.715	0.046	0.0843	0.0017	0.46483	0.0631	0.0034		521.7	9.9	545	27	680	120		76.7206
TGB5_70	210	0.68306		2.533	0.054	0.2135	0.0046	0.70157	0.0863	0.0015		1247	24	1281	16	1348	34		92.5074
TGB5_71	139.3	0.481		2.309	0.079	0.2095	0.006	0.72162	0.0801	0.002		1226	32	1213	24	1193	50		102.766
TGB5_72	156.7	0.91659		0.849	0.036	0.101	0.0018	0.24997	0.0618	0.0025		620	10	626	20	648	87		95.679
TGB5_73	8.4	0.93985		1.04	0.23	0.1058	0.0032	0.60639	0.07	0.014		648	18	710	110	820	430		79.0244
TGB5_74	162.3	0.574053		6.62	0.16	0.39	0.01	0.75506	0.1257	0.0023		2121	47	2060	22	2042	32		103.869
TGB5_76	125	0.656599		6.15	0.22	0.363	0.015	0.80869	0.1258	0.0029		1994	71	1994	31	2036	41		97.9371
TGB5_77	165	0.04		0.682	0.03	0.0881	0.0028	0.3294	0.058	0.0024		544	17	527	18	531	88		102.448
TGB5_78	396	0.204499		1.699	0.051	0.1649	0.0046	0.69231	0.0775	0.0022		983	26	1007	19	1124	57		87.4555
TGB5_80	219	0.407332		0.84	0.034	0.0981	0.003	0.48608	0.0637	0.0026		603	18	618	19	712	85		84.691
TGB5_81	155.6	0.514668		0.754	0.033	0.0891	0.0025	0.61696	0.0602	0.0024		550	15	573	20	611	82		90.0164
TGB5_82	552	0.221729		0.822	0.022	0.0978	0.0031	0.74223	0.0614	0.0013		601	18	609	12	649	46		92.604
TGB5_83	169	0.17301		0.7	0.032	0.0842	0.0031	0.43126	0.0599	0.0022		521	18	537	19	587	80		88.7564
TGB5_85	27.5	0.2849		0.955	0.084	0.101	0.0037	0.25638	0.0667	0.0059		620	22	673	45	750	190		82.6667
TGB5_86	72.1	0.17452		1.63	0.084	0.1564	0.0067	0.52711	0.0759	0.003		936	38	985	34	1079	82		86.747
TGB5_87	44.5	0.373134		1.015	0.088	0.1098	0.0074	0.52317	0.0642	0.0047		671	43	705	44	760	170		88.2895
TGB5_89	220	0.253872		11	0.4	0.418	0.013	0.87265	0.1863	0.003		2248	59	2525	33	2708	27		83.0133
TGB5_90	104	0.358423		0.643	0.049	0.0781	0.0024	0.42169	0.0584	0.0042		485	14	501	30	520	150		93.2692
TGB5_91	81.6	0.396825		0.742	0.042	0.089	0.0034	0.35303	0.0603	0.0033		550	20	562	24	580	120		94.8276
TGB5_93	199.2	0.432713		0.849	0.035	0.1004	0.0027	0.55434	0.0614	0.0019		617	16	622	19	671	66		91.9523
TGB5_94	156.4	0.704225		11.13	0.71	0.439	0.028	0.97185	0.1852	0.0024		2360	120	2531	60	2699	21		87.4398
TGB5_96	372	0.304136		3.69	0.11	0.2792	0.0089	0.81129	0.0971	0.0017		1586	45	1567	23	1567	32		101.213
TGB5_97	134.8	0.590667		0.732	0.037	0.0925	0.0039	0.61833	0.059	0.0025		570	23	556	21	566	89		100.707
TGB5_27	206.9	0.380518		0.723	0.037	0.0766	0.0029	0.48763	0.0687	0.0035		476	18	551	22	860	110		55.3488
TGB5_55	869	0.283046		0.4378	0.0084	0.04704	0.00085	0.35616	0.0674	0.0016		296.3	5.2	370	6.4	843	49		35.1483
TGB5_88	22.4	0.404858		0.98	0.16	0.0799	0.0084	0.33357	0.08	0.012		494	50	699	78	1350	330		36.5926
Bou Irhardaeine Fm.
TGB7				Ratios								Ages
#	U [ppm]	Th/U		207Pb/235U	2 s	206Pb/238U	2 s	rhod	207Pb/206Pb	2 s		206Pb/238U	2 s	207Pb/235U	2 s	207Pb/206Pb	2 s		%Conc
TGB7_1	134.5	0.329272		0.777	0.019	0.0934	0.0017	0.58474	0.0601	0.001		575.7	9.8	584	11	596	38		96.594
TGB7_2	77	0.359454		0.783	0.026	0.0927	0.0022	0.087092	0.0613	0.0019		574	12	586	15	631	66		90.9667
TGB7_4	562	0.466636		0.85	0.016	0.1012	0.0018	0.72872	0.06095	0.00082		621	11	625	8.9	631	29		98.4152
TGB7_5	118.7	0.49456		0.901	0.019	0.1052	0.0018	0.54264	0.0617	0.001		645	10	651	10	653	35		98.7749
TGB7_6	306	0.476644		0.755	0.018	0.0921	0.0016	0.76172	0.05974	0.00086		568	9.7	572	11	590	32		96.2712
TGB7_7	336	0.311721		0.799	0.028	0.0955	0.0027	0.73513	0.0604	0.0013		587	16	594	16	607	49		96.7051
TGB7_8	438	0.591716		13.19	0.22	0.5097	0.0084	0.78101	0.1878	0.0021		2653	36	2693	16	2721	18		97.5009
TGB7_9	127	0.725163		1.693	0.033	0.1642	0.0025	0.61019	0.0751	0.0011		980	14	1004	13	1075	27		91.1628
TGB7_10	241	0.116959		4.06	0.13	0.2652	0.0068	0.85892	0.1106	0.0016		1514	35	1641	26	1802	27		84.0178
TGB7_11	187.8	0.234192		1.162	0.034	0.125	0.0035	0.73144	0.0666	0.0013		759	20	783	16	822	40		92.3358
TGB7_12	98.2	0.206186		3.77	0.11	0.2729	0.0069	0.71093	0.0996	0.0019		1554	35	1586	22	1616	36		96.1634
TGB7_13	143	0.422654		0.79	0.046	0.093	0.004	0.49762	0.0605	0.0024		572	24	585	26	586	79		97.6109
TGB7_14	67.4	0.595948		6.102	0.091	0.3605	0.0052	0.76126	0.122	0.0013		1983	25	1990	13	1985	18		99.8992
TGB7_15	25.9	0.689655		3.93	0.1	0.2707	0.0054	0.8294	0.1049	0.0015		1543	27	1619	21	1716	28		89.9184
TGB7_16	86.7	0.393546		1.831	0.048	0.1759	0.0036	0.64956	0.075	0.0012		1046	20	1055	17	1065	32		98.216
TGB7_17	186	0.569801		0.749	0.015	0.0903	0.0015	0.57337	0.05962	0.00083		557.2	8.8	566.9	8.5	591	29		94.2809
TGB7_19	106.4	0.680272		0.876	0.018	0.1045	0.0017	0.53791	0.06041	0.00099		640.6	9.7	638.6	9.5	613	34		104.502
TGB7_20	33.2	0.323625		6.44	0.14	0.376	0.0072	0.7563	0.124	0.0016		2055	34	2038	19	2020	24		101.733
TGB7_21	134.1	0.293945		0.799	0.021	0.0966	0.0019	0.60897	0.05955	0.00098		594	11	595	12	578	35		102.768
TGB7_22	184	0.339789		0.74	0.018	0.0909	0.0016	0.371	0.05905	0.00093		560.5	9.6	561	10	559	35		100.268
TGB7_23	225.9	0.252717		0.843	0.019	0.1007	0.0017	0.76427	0.06121	0.00088		618	10	620	11	642	31		96.2617
TGB7_24	220	0.644745		0.882	0.017	0.1055	0.0019	0.76295	0.06072	0.00076		646	11	642.1	9.5	629	26		102.703
TGB7_25	125	0.1734		6.688	0.098	0.3751	0.0052	0.7395	0.1293	0.0013		2052	24	2070	13	2087	18		98.323
TGB7_26	318	0.176523		3.638	0.086	0.2729	0.0058	0.82785	0.0962	0.0012		1554	29	1557	19	1552	24		100.129
TGB7_27	708	0.0317158		0.872	0.016	0.104	0.0016	0.66145	0.06119	0.00086		637.9	9.4	636.9	9	644	29		99.0528
TGB7_28	47.2	0.198373		0.761	0.017	0.0939	0.0013	0.029748	0.0591	0.0012		578.2	7.9	573.4	9.9	556	45		103.993
TGB7_29	35.8	0.147059		6.14	0.11	0.3634	0.0052	0.69547	0.1247	0.0017		1997	25	1995	16	2022	25		98.7636
TGB7_30	252	0.215983		0.848	0.015	0.1028	0.0015	0.54287	0.06043	0.00077		630.4	8.5	622.8	8	620	26		101.677
TGB7_31	149.9	0.0855432		6.71	0.17	0.3874	0.0095	0.81168	0.1254	0.0019		2113	45	2069	22	2032	27		103.986
TGB7_32	373	0.26738		0.835	0.021	0.099	0.0022	0.50745	0.0611	0.0012		608	13	615	12	617	38		98.5413
TGB7_33	27.76	0.693001		5.08	0.18	0.3293	0.0095	0.7318	0.1131	0.0026		1832	45	1831	29	1845	42		99.2954
TGB7_34	127	0.368596		14.83	0.36	0.541	0.012	0.7966	0.1992	0.003		2789	49	2799	23	2819	24		98.9358
TGB7_35	138	0.377644		0.886	0.024	0.0966	0.0017	0.4299	0.0668	0.0018		594	10	645	13	834	56		71.223
TGB7_37	39.4	0.738007		0.97	0.033	0.1095	0.0021	0.22112	0.064	0.0018		669	12	685	17	739	56		90.5277
TGB7_39	30.4	1.37741		1.765	0.052	0.1706	0.0037	0.16724	0.0754	0.002		1015	20	1030	19	1061	52		95.6645
TGB7_40	36.5	0.304414		0.934	0.039	0.1082	0.0017	0.047829	0.0623	0.0026		662	10	660	15	632	61		104.747
TGB7_41	114	0.343289		3.549	0.058	0.2676	0.0039	0.6235	0.09629	0.00099		1528	20	1539	13	1550	19		98.5806
TGB7_43	172	0.287356		5.34	0.16	0.3372	0.0085	0.78497	0.1138	0.002		1876	42	1876	26	1864	31		100.644
TGB7_44	156.7	0.325203		0.83	0.016	0.0989	0.0015	0.68053	0.06139	0.00081		607.6	9.1	612.4	8.8	650	29		93.4769
TGB7_45	73.8	0.260417		2.301	0.061	0.2069	0.0045	0.53132	0.0816	0.0016		1215	25	1211	19	1243	42		97.7474
TGB7_46	184	0.0809061		0.807	0.015	0.0969	0.0014	0.62345	0.06077	0.00072		596	8.1	601.9	8.4	626	25		95.2077
TGB7_47	209	0.2		0.878	0.016	0.1035	0.0016	0.63156	0.06176	0.00081		634.6	9.5	640	9	667	27		95.1424
TGB7_48	148.6	0.423012		0.5005	0.0087	0.0656	0.00094	0.46493	0.05575	0.0009		409.5	5.7	411.6	5.9	437	35		93.7071
TGB7_49	84.4	0.362319		3.45	0.1	0.2527	0.005	0.63825	0.0984	0.0019		1454	27	1513	24	1583	36		91.8509
TGB7_50	68.4	0.369004		1.315	0.032	0.1397	0.0022	0.40726	0.0679	0.0013		843	13	851	14	858	39		98.2517
TGB7_51	122.3	0.694927		0.801	0.015	0.097	0.0013	0.61993	0.05968	0.00086		596.4	7.8	597.5	8	594	31		100.404
TGB7_52	125.7	0.405351		6.96	0.12	0.3882	0.006	0.78996	0.1303	0.0014		2113	28	2109	16	2102	18		100.523
TGB7_53	30.3	0.313185		1.037	0.036	0.1126	0.0015	0.34146	0.067	0.002		687.8	8.6	716	17	819	57		83.9805
TGB7_54	134	0.395257		0.742	0.017	0.0906	0.0015	0.45763	0.0596	0.0011		558.7	8.7	563	10	581	39		96.1618
TGB7_55	254	0.271518		0.714	0.014	0.0874	0.0018	0.66267	0.05932	0.00091		540	11	546.5	8.4	570	33		94.7368
TGB7_56	163.8	0.651466		0.72	0.013	0.0875	0.0012	0.46264	0.05979	0.0009		540.4	7.4	549.9	7.8	600	31		90.0667
TGB7_58	117.8	0.3861		0.874	0.019	0.1033	0.0018	0.26259	0.0615	0.001		633	10	636	10	647	36		97.8362
TGB7_59	37.6	0.374532		54	14	0.64	0.12	0.99402	0.471	0.064		3110	460	3410	350	3850	290		80.7792
TGB7_60	100.2	0.280978		0.818	0.013	0.0985	0.001	0.332	0.06002	0.00079		605.4	6.1	607.2	6.8	598	29		101.237
TGB7_61	49.6	0.21645		7.52	0.31	0.3991	0.0081	0.86397	0.1366	0.0037		2166	38	2167	37	2171	45		99.7697
TGB7_62	342	0.223964		0.839	0.024	0.0997	0.0028	0.74524	0.0612	0.0011		612	16	621	14	642	38		95.3271
TGB7_63	159	0.361533		0.84	0.019	0.1003	0.0022	0.76357	0.06028	0.0009		616	13	620	11	616	34		100
TGB7_64	59.2	0.350877		0.893	0.048	0.0958	0.0013	0.11484	0.067	0.0031		589.8	7.5	637	22	742	70		79.4879
TGB7_65	195	0.238095		0.989	0.032	0.1076	0.0016	0.58872	0.0656	0.0016		658.6	9.4	695	16	788	50		83.5787
TGB7_66	126	0.322893		0.869	0.021	0.097	0.0012	0.33965	0.065	0.0012		596.4	7.1	633	11	764	37		78.0628
TGB7_67	122.9	0.240964		1.012	0.024	0.1121	0.0023	0.61686	0.0661	0.0014		685	13	711	13	825	42		83.0303
TGB7_68	626	0.344828		4.25	0.29	0.262	0.015	0.97305	0.118	0.0022		1493	77	1662	59	1926	34		77.5182
TGB7_69	74.6	0.671141		2.289	0.056	0.1999	0.0035	0.59058	0.084	0.0017		1174	19	1206	17	1281	38		91.6472
TGB7_70	368	0.361011		2.87	0.12	0.2266	0.0075	0.96589	0.0933	0.0012		1315	40	1372	32	1492	25		88.1367
TGB7_71	200	0.311333		0.724	0.02	0.0879	0.0016	0.55371	0.0596	0.0013		543	9.4	552	12	599	52		90.6511
TGB7_72	406	0.0821018		3.156	0.037	0.2574	0.003	0.78961	0.08935	0.00069		1476	16	1446.9	9.2	1414	15		104.385
TGB7_74	44.1	0.257732		6.37	0.1	0.3795	0.0052	0.69886	0.1214	0.0014		2075	24	2027	14	1978	20		104.904
TGB7_78	55.5	0.480077		9.68	0.19	0.4596	0.0068	0.8097	0.1537	0.0016		2436	30	2405	18	2385	18		102.138
TGB7_79	339.3	0.254453		0.812	0.017	0.0988	0.0018	0.77274	0.05944	0.00077		607	11	603.7	9.5	581	28		104.475
TGB7_82	246	0.108932		2.726	0.055	0.2288	0.0042	0.85613	0.08556	0.00091		1327	22	1333	15	1325	21		100.151
TGB7_83	258	0.33557		0.747	0.02	0.0885	0.0014	0.29204	0.06	0.0013		546.5	8.4	565	11	587	44		93.1005
TGB7_84	267	0.119048		5.252	0.082	0.3175	0.005	0.82895	0.1172	0.001		1782	26	1859	13	1912	16		93.2008
TGB7_85	114.3	0.390016		1.509	0.067	0.1519	0.0053	0.76122	0.0699	0.002		911	30	933	27	919	60		99.1295
TGB7_86	282	0.2		1.804	0.03	0.1726	0.0024	0.82723	0.07399	0.00066		1026	13	1045	11	1039	18		98.7488
TGB7_42	13.67	0.0341297		0.592	0.071	0.0556	0.0013	-0.0088567	0.0749	0.0085		349	8.1	448	39	870	200		40.1149
Kef ed Deba Fm.
TBB10				Ratios								Ages
#	U [ppm]	Th/U		207Pb/235U	2 s	206Pb/238U	2 s	rhod	207Pb/206Pb	2 s		206Pb/238U	2 s	207Pb/235U	2 s	207Pb/206Pb	2 s		%Conc
TGB10_1	76.6	0.895255		3.3	0.11	0.255	0.0077	0.55507	0.0926	0.0017		1463	40	1478	24	1474	34		99.2537
TGB10_2	21.96	0.798722		4.48	0.21	0.299	0.012	0.31477	0.1052	0.0033		1684	58	1718	38	1704	59		98.8263
TGB10_3	16.66	0.853242		0.989	0.067	0.1087	0.0038	0.20732	0.0648	0.0039		665	22	691	33	760	120		87.5
TGB10_4	61.2	1.3624		5.27	0.24	0.332	0.014	0.82436	0.112	0.0022		1842	66	1868	37	1827	35		100.821
TGB10_5	18.3	0.2457		1.86	0.15	0.1667	0.0079	0.47021	0.0788	0.0047		992	43	1051	52	1130	110		87.7876
TGB10_6	309	0.158228		0.847	0.034	0.0989	0.0042	0.6922	0.0599	0.0015		607	24	621	19	590	55		102.881
TGB10_7	67.9	0.3003		8.01	0.34	0.409	0.017	0.6515	0.1396	0.003		2205	78	2236	37	2223	36		99.1903
TGB10_10	30.9	0.483559		0.846	0.051	0.1005	0.0046	0.71027	0.0603	0.0027		617	27	617	28	600	100		102.833
TGB10_11	182.8	0.268817		0.823	0.036	0.097	0.0038	0.49008	0.0603	0.0019		596	22	610	19	620	67		96.129
TGB10_15	88	0.336587		1.628	0.056	0.1547	0.0045	0.39991	0.0743	0.0019		927	25	982	22	1054	56		87.9507
TGB10_16	76.1	3.7037		1.756	0.06	0.166	0.0059	0.70099	0.0728	0.0014		989	33	1026	22	1009	42		98.0178
TGB10_17	77.9	0.141044		2.348	0.067	0.2042	0.0066	0.58344	0.0815	0.0015		1196	35	1224	20	1233	37		96.9992
TGB10_18	60	0.61237		0.847	0.035	0.0967	0.0037	0.1057	0.0645	0.0047		595	22	621	19	663	79		89.7436
TGB10_20	208	0.0568182		0.755	0.024	0.0907	0.0031	0.35293	0.0598	0.0017		559	18	573	13	591	61		94.5854
TGB10_23	13.2	0.232558		2.61	0.3	0.199	0.021	0.050229	0.099	0.014		1160	110	1265	78	1340	200		86.5672
TGB10_25	88	0.290698		0.83	0.11	0.099	0.01	0.62106	0.0615	0.0065		604	60	610	60	600	200		100.667
TGB10_28	23.7	0.291545		1.47	0.18	0.154	0.015	0.56214	0.0705	0.0069		916	84	911	68	880	190		104.091
TGB10_39	683	0.314762		0.821	0.023	0.097	0.0024	0.502	0.0603	0.0014		596	14	608	13	617	50		96.5964
TGB10_41	209	0.340136		0.906	0.066	0.1033	0.0081	0.67509	0.0632	0.0032		632	47	653	35	670	100		94.3284
TGB10_43	43.8	1.01729		1.102	0.067	0.1196	0.0046	0.29753	0.066	0.0041		728	27	748	33	740	120		98.3784
TGB10_45	29.6	0.419111		0.834	0.039	0.0989	0.0024	0.11053	0.0607	0.0026		608	14	613	22	625	85		97.28
TGB10_46	260	0.475059		6.59	0.14	0.3645	0.0094	0.42835	0.1272	0.0013		2001	44	2056	19	2062	17		97.0417
TGB10_47	71.9	0.672495		0.788	0.034	0.0938	0.0025	0.32393	0.059	0.0017		578	15	588	20	565	60		102.301
TGB10_48	115	0.566251		0.73	0.024	0.0873	0.0019	0.53937	0.0593	0.0018		539	11	555	14	571	65		94.3958
TGB10_49	48.6	0.584795		1.729	0.058	0.1677	0.0047	0.23013	0.0737	0.002		999	26	1023	22	1038	56		96.2428
TGB10_50	337	0.282247		0.847	0.026	0.0987	0.0022	0.27171	0.0611	0.0012		606	13	622	14	637	41		95.1334
TGB10_51	78.1	0.338868		3.07	0.24	0.2321	0.0057	0.36128	0.0951	0.0055		1345	30	1408	53	1490	95		90.2685
TGB10_52	93	0.531915		0.839	0.026	0.0988	0.0016	0.19503	0.0608	0.0013		607.3	9.6	618	14	649	46		93.5747
TGB10_53	532	0.765697		19.7	0.66	0.573	0.016	0.50273	0.2415	0.0034		2925	66	3070	32	3128	22		93.5102
TGB10_62	77	0.724113		0.924	0.039	0.104	0.0017	0.15585	0.0618	0.002		638	10	662	21	647	68		98.609
TGB10_67	8.11	0.484731		0.948	0.072	0.1074	0.0028	0.2003	0.0622	0.0047		657	16	674	39	690	150		95.2174
TGB10_68	59.1	0.210084		0.933	0.026	0.1057	0.0029	0.58028	0.063	0.0018		650	16	671	15	704	57		92.3295
TGB10_69	186	0.625		0.763	0.012	0.0892	0.0018	0.48043	0.06076	0.00071		551	11	575.6	6.7	628	25		87.7389
TGB10_71	38.6	0.411523		0.801	0.028	0.0891	0.0016	0.57836	0.0643	0.002		549.9	9.4	596	15	743	69		74.0108
TGB10_74	20.4	0.273973		1.199	0.051	0.1282	0.0021	0.21652	0.0664	0.0023		777	12	797	24	822	75		94.5255
TGB10_76	318	0.0478469		9.85	0.2	0.4324	0.0089	0.52825	0.158	0.0013		2321	41	2418	20	2433	14		95.3966
TGB10_77	183	0.484731		0.884	0.024	0.10428	0.00094	0.20813	0.0607	0.001		639.4	5.5	642	13	623	36		102.632
TGB10_78	51.4	0.901713		2.333	0.067	0.1933	0.0042	0.32854	0.0861	0.0022		1139	23	1227	20	1352	49		84.2456
TGB10_79	27.8	0.217391		8.61	0.64	0.423	0.025	0.71316	0.1423	0.0062		2260	110	2273	62	2246	71		100.623
TGB10_81	40.7	0.400481		0.809	0.031	0.0931	0.0019	0.22983	0.0625	0.0026		574	11	600	17	674	87		85.1632
TGB10_82	158.1	0.345901		0.749	0.037	0.0907	0.0044	0.60234	0.0589	0.0018		559	26	568	22	579	70		96.5458
TGB10_84	378	0.418585		5.32	0.25	0.289	0.014	0.68911	0.1295	0.003		1640	72	1867	40	2091	42		78.4314
TGB10_86	109	0.512033		1.607	0.06	0.1578	0.0056	0.76616	0.0726	0.0014		943	31	969	23	1011	39		93.274
TGB10_88	112.2	0.263505		2.173	0.05	0.1862	0.0053	0.60995	0.08292	0.00094		1106	31	1174	15	1265	22		87.4308
TGB10_89	66.4	0.439174		12.12	0.29	0.446	0.012	0.59622	0.1928	0.0024		2383	53	2614	22	2764	21		86.2156
TGB10_90	148.8	0.613121		0.726	0.026	0.0856	0.0025	0.41136	0.0597	0.0013		530	15	558	15	592	48		89.527
TGB10_91	38.2	0.39093		0.931	0.04	0.103	0.0027	-0.13688	0.0639	0.0021		632	16	665	21	747	67		84.6051
TGB10_96	76.1	0.337724		0.822	0.03	0.0939	0.0022	0.18386	0.0615	0.0019		578	13	607	17	641	65		90.1716
TGB10_98	159.4	0.414422		0.829	0.029	0.0962	0.0023	0.4146	0.0616	0.0015		592	14	611	16	651	52		90.937
TGB10_103	28.2	0.547345		0.901	0.052	0.0774	0.0048	0.65614	0.0624	0.003		480	29	654	27	659	99		72.8376
TGB10_106	173	0.556174		6.15	0.16	0.3523	0.006	0.47102	0.1231	0.0015		1945	28	1997	24	2003	21		97.1043
TGB10_110	208	0.406504		0.816	0.024	0.0955	0.0023	0.60254	0.0599	0.0011		588	14	609	14	601	42		97.8369
TGB10_114	54.8	0.370782		2.401	0.083	0.2049	0.0055	0.35199	0.0833	0.0018		1201	29	1239	25	1269	42		94.6414
TGB10_115	210	0.385802		0.84	0.027	0.0969	0.0026	0.59096	0.0616	0.0012		596	15	620	15	652	41		91.411
TGB10_21	10.5	0.249377		0.79	0.19	0.058	0.01	0.5293	0.103	0.026		362	61	526	97	1090	410		33.211
TGB10_97	14.73	4.86855		5.81	0.2	0.0574	0.0027	0.62751	0.717	0.027		359	17	1948	29	4775	61		7.51832
TGB10_100	8.66	4.57038		0.567	0.066	0.0105	0.00066	0.13975	0.378	0.041		67.3	4.2	455	39	3830	170		1.75718
TGB10_108	77.2	0.657895		0.931	0.059	0.0715	0.0021	0.94168	0.0647	0.003		445	13	663	27	713	65		62.4123
El Rhirane Turbidites
TGB12A				Ratios								Ages
#	U [ppm]	Th/U		207Pb/235U	2 s	206Pb/238U	2 s	rhod	207Pb/206Pb	2 s		206Pb/238U	2 s	207Pb/235U	2 s	207Pb/206Pb	2 s		%Conc
TGB12A_2	338	0.235849		0.717	0.019	0.088	0.0022	0.79762	0.05931	0.00098		543	13	547	11	581	36		93.4596
TGB12A_4	66.1	0.368732		4.9	0.16	0.3171	0.0084	0.69848	0.1124	0.0027		1772	41	1799	28	1843	43		96.1476
TGB12A_5	58.5	0.360231		0.732	0.037	0.0852	0.0025	0.16218	0.0625	0.0025		526	15	552	21	645	83		81.5504
TGB12A_6	173	0.155521		4.34	0.39	0.267	0.022	0.81238	0.1125	0.0061		1510	110	1670	72	1800	98		83.8889
TGB12A_8	22.2	0.626566		5.63	0.29	0.346	0.016	0.74736	0.12	0.0039		1923	74	1923	46	1962	56		98.0122
TGB12A_10	243	0.107066		6.37	0.18	0.3749	0.0092	0.78044	0.1237	0.0022		2049	43	2027	24	2005	31		102.195
TGB12A_11	36.6	0.30175		0.693	0.03	0.0864	0.0026	0.46634	0.0608	0.0025		534	15	533	18	581	89		91.9105
TGB12A_16	115.5	0.405351		6.65	0.18	0.3849	0.009	0.73251	0.1265	0.0022		2097	42	2062	25	2045	32		102.543
TGB12A_20	27.7	1.002		0.729	0.055	0.0899	0.0046	0.58234	0.0599	0.0039		554	27	553	33	570	140		97.193
TGB12A_22	150	0.212314		1.395	0.058	0.1519	0.0059	0.81829	0.0684	0.0017		909	33	885	25	872	54		104.243
TGB12A_24	101	0.353357		5.66	0.21	0.351	0.011	0.81115	0.1212	0.0029		1936	52	1918	32	1965	42		98.5242
TGB12A_25	77.1	0.259067		0.875	0.045	0.0971	0.0039	0.38701	0.0679	0.003		596	23	632	24	821	88		72.5944
TGB12A_26	720	0.305623		1.167	0.03	0.1318	0.0031	0.77922	0.0665	0.0011		798	18	790	14	835	33		95.5689
TGB12A_27	251	0.248756		10.05	0.47	0.417	0.017	0.7793	0.1809	0.0052		2239	77	2437	45	2653	47		84.395
TGB12A_28	324	0.0911577		15.62	0.55	0.54	0.016	0.78462	0.2139	0.0047		2776	67	2845	33	2944	35		94.2935
TGB12A_29	111.9	0.574053		0.746	0.033	0.0911	0.0035	0.78629	0.061	0.0015		561	21	562	19	627	51		89.4737
TGB12A_30	147.1	0.520021		0.828	0.032	0.1005	0.0035	0.68606	0.0605	0.0017		617	20	613	17	619	57		99.6769
TGB12A_31	138	0.434783		1.019	0.034	0.1138	0.0043	0.62254	0.0668	0.002		693	25	718	17	828	64		83.6957
TGB12A_32	79.8	0.358423		1.458	0.058	0.1465	0.0049	0.58259	0.0728	0.0018		883	27	907	24	998	48		88.477
TGB12A_35	79.6	0.273748		1.413	0.033	0.1404	0.0027	0.74485	0.0732	0.0012		847	15	892	14	1017	32		83.2842
TGB12A_36	140	0.609756		0.847	0.022	0.1015	0.0024	0.678	0.0603	0.0013		623	14	621	12	612	44		101.797
TGB12A_37	64.9	0.322269		0.856	0.036	0.1016	0.0032	0.72264	0.0606	0.0018		623	19	626	20	624	66		99.8397
TGB12A_38	224	0.270563		0.833	0.025	0.101	0.0028	0.75087	0.0613	0.0013		620	16	615	14	652	45		95.092
TGB12A_39	334	0.524934		15	0.36	0.552	0.011	0.77666	0.2013	0.0029		2840	47	2815	23	2842	25		99.9296
TGB12A_40	180.7	0.211864		3.81	0.17	0.2488	0.0067	0.59938	0.1116	0.0033		1431	34	1582	34	1806	50		79.2359
TGB12A_41	252	0.309598		3.43	0.15	0.262	0.01	0.82332	0.0962	0.0025		1496	52	1509	35	1543	50		96.954
TGB12A_42	72.5	0.290698		0.884	0.039	0.0983	0.0038	0.65192	0.065	0.0021		604	22	638	21	766	68		78.8512
TGB12A_43	152.6	0.169205		1.354	0.046	0.1399	0.0037	0.51437	0.0693	0.0015		843	21	865	20	900	44		93.6667
TGB12A_44	98.2	0.488043		0.83	0.028	0.0952	0.0024	0.63098	0.0629	0.0016		586	14	613	15	696	56		84.1954
TGB12A_45	200	0.22779		2.052	0.075	0.1805	0.006	0.85275	0.084	0.0016		1068	33	1128	25	1292	35		82.6625
TGB12A_46	125.7	0.409165		0.757	0.031	0.0923	0.0034	0.81999	0.0599	0.0013		571	20	574	18	596	46		95.8054
TGB12A_48	118.6	0.359971		5.51	0.13	0.3501	0.0077	0.76041	0.1162	0.0019		1941	37	1899	21	1898	30		102.266
TGB12A_50	180	0.49975		4.2	0.12	0.2633	0.0067	0.83943	0.1195	0.0019		1518	36	1671	24	1953	27		77.7266
TGB12A_51	39.8	0.553097		0.968	0.073	0.1133	0.0069	0.80227	0.0637	0.0031		689	40	680	38	690	100		99.8551
TGB12A_52	83.2	0.196464		2.55	0.095	0.2166	0.0076	0.79745	0.09	0.0019		1261	40	1284	28	1417	42		88.9908
TGB12A_53	84.3	0.149477		0.906	0.032	0.1077	0.0036	0.68867	0.0627	0.0018		661	21	651	17	711	60		92.9677
TGB12A_54	248	0.0775194		0.691	0.024	0.0863	0.0026	0.78788	0.0599	0.0013		533	15	533	15	595	48		89.5798
TGB12A_55	86.4	0.528821		4.69	0.19	0.292	0.01	0.85388	0.118	0.0023		1649	51	1752	34	1921	34		85.8407
TGB12A_56	81.6	0.824402		1.061	0.03	0.118	0.0029	0.6257	0.0654	0.0015		719	17	732	15	785	49		91.5924
TGB12A_57	169	0.157729		19.74	0.91	0.603	0.027	0.76607	0.2438	0.0075		3030	110	3098	45	3134	51		96.6816
TGB12A_58	686	0.0977517		1.95	0.12	0.186	0.011	0.84643	0.0763	0.0027		1098	57	1094	43	1094	72		100.366
TGB12A_60	90.4	0.423908		5.68	0.16	0.3465	0.0091	0.76182	0.1219	0.0022		1923	45	1924	25	1981	34		97.0722
TGB12A_61	91.5	0.329056		1.558	0.05	0.1572	0.004	0.66031	0.0742	0.0017		940	22	954	20	1054	44		89.1841
TGB12A_63	55.5	0.416667		0.628	0.021	0.0788	0.0017	0.36645	0.0623	0.0022		489	10	500	13	655	75		74.6565
TGB12A_64	211	0.192308		5.51	0.23	0.316	0.012	0.79938	0.1346	0.0034		1771	57	1894	37	2146	46		82.5256
TGB12A_65	40.7	0.665336		1.399	0.074	0.1478	0.0066	0.68648	0.0714	0.0027		890	38	879	32	972	75		91.5638
TGB12A_66	141	0.367107		6.02	0.22	0.356	0.012	0.77357	0.1213	0.0028		1964	54	1973	32	1971	40		99.6449
TGB12A_68	85.7	0.367377		0.901	0.029	0.1054	0.0027	0.64188	0.062	0.0015		645	16	650	15	660	50		97.7273
TGB12A_70	103.9	0.367647		1.235	0.047	0.1345	0.0043	0.69088	0.0656	0.0017		815	24	813	21	802	56		101.621
TGB12A_71	119.1	0.0656168		0.811	0.04	0.0957	0.0038	0.66712	0.0623	0.0024		588	22	606	23	673	77		87.37
TGB12A_72	373	0.409165		15.2	0.66	0.538	0.021	0.79882	0.2063	0.0054		2761	89	2814	42	2869	43		96.2356
TGB12A_73	180	0.381971		3.75	0.15	0.2767	0.0093	0.77738	0.098	0.0023		1575	47	1583	31	1593	45		98.8701
TGB12A_74	148	0.616523		0.874	0.037	0.1038	0.0038	0.72131	0.0609	0.0018		636	22	637	20	625	64		101.76
TGB12A_75	143	0.464037		0.906	0.036	0.1054	0.0034	0.20746	0.0618	0.0017		649	20	650	19	638	58		101.724
TGB12A_76	112.2	0.172414		3.68	0.15	0.2727	0.0092	0.75586	0.0957	0.0023		1550	46	1563	32	1538	46		100.78
TGB12A_78	176	0.269542		6.04	0.27	0.358	0.014	0.79682	0.1217	0.0032		1965	68	1967	39	1973	48		99.5945
TGB12A_79	150	0.334448		3.86	0.19	0.272	0.01	0.85892	0.1025	0.0026		1544	52	1607	43	1659	46		93.0681
TGB12A_80	90.1	0.442282		0.836	0.043	0.0994	0.0038	0.503	0.0613	0.0024		612	22	610	24	624	79		98.0769
TGB12A_81	107.1	0.337838		6.87	0.35	0.371	0.017	0.7844	0.1361	0.0042		2027	79	2074	46	2158	55		93.9296
TGB12A_12	374	0.25		0.389	0.015	0.0545	0.0018	0.73543	0.0527	0.0013		342	11	332	11	294	57		116.327
TGB12A_19	24.2	0.425532		0.512	0.087	0.0735	0.0097	0.34466	0.055	0.01		457	59	416	57	360	390		126.944
TGB12A_62	926	0.362319		0.409	0.018	0.0556	0.0024	0.86218	0.0573	0.0013		349	15	346	13	509	49		68.5658
Ras el Ksar Fm. (Bou Rached)
TGB14A				Ratios								Ages
#	U [ppm]	Th/U		207Pb/235U	2 s	206Pb/238U	2 s	rhod	207Pb/206Pb	2 s		206Pb/238U	2 s	207Pb/235U	2 s	207Pb/206Pb	2 s		%Conc
TGB14A_39	1009	0.158479		0.3241	0.007	0.04306	0.00094	0.82032	0.05433	0.00059		271.7	5.8	285.3	5.5	381	24		71.3123
TGB14A_38	195	0.551876		0.69	0.027	0.0838	0.003	0.4913	0.0607	0.001		518	18	529	16	618	36		83.8188
TGB14A_97	515	0.284091		0.74	0.03	0.0843	0.0038	0.88788	0.0634	0.001		521	23	559	18	712	34		73.1742
TGB14A_66	209.2	0.765697		0.671	0.015	0.0849	0.0017	0.73888	0.05818	0.00099		525	10	522.6	9.3	535	37		98.1308
TGB14A_42	274	0.117786		0.702	0.028	0.0876	0.0034	0.85123	0.0615	0.0012		541	20	537	16	642	42		84.2679
TGB14A_11	377	0.140845		0.728	0.021	0.0882	0.0025	0.83156	0.059	0.001		545	15	558	12	569	37		95.7821
TGB14A_92	45.3	0.47619		0.765	0.026	0.0886	0.0021	0.60241	0.062	0.0015		547	12	580	16	674	51		81.1573
TGB14A_90	373	0.257069		0.812	0.024	0.0899	0.0025	0.82041	0.0643	0.0011		554	15	600	13	745	37		74.3624
TGB14A_41	60.9	0.21322		0.778	0.023	0.0899	0.0016	0.27133	0.0626	0.0018		554.8	9.6	582	13	662	57		83.8066
TGB14A_82	377	0.350631		0.781	0.017	0.0911	0.0018	0.66589	0.06182	0.00092		562	10	584.7	9.9	665	31		84.5113
TGB14A_84	136	0.474383		0.739	0.016	0.0913	0.0016	0.69784	0.05897	0.00093		562.9	9.2	561.1	9.1	565	34		99.6283
TGB14A_68	425	0.00666667		0.764	0.018	0.0917	0.0017	0.80023	0.06026	0.00084		566	10	575	10	608	30		93.0921
TGB14A_13	199.2	0.616903		0.783	0.018	0.0926	0.0017	0.6854	0.06088	0.0009		571	10	587	10	627	32		91.0686
TGB14A_37	94.2	0.514139		0.766	0.016	0.0938	0.0017	0.64752	0.05896	0.00096		578	10	577.5	8.9	557	35		103.77
TGB14A_20	13.97	0.376932		0.784	0.028	0.0942	0.0015	0.19321	0.06	0.0022		579.9	9	590	15	589	78		98.455
TGB14A_17	205.7	0.589623		0.773	0.014	0.0942	0.0015	0.73695	0.05976	0.00072		580.3	8.9	582.7	7.9	596	26		97.3658
TGB14A_1	144	0.384615		0.804	0.029	0.0948	0.0025	0.8172	0.0611	0.0014		583	15	596	16	629	47		92.6868
TGB14A_99	474	0.0856898		0.804	0.019	0.0947	0.002	0.67603	0.06118	0.00093		583	12	599	11	645	31		90.3876
TGB14A_29	354	0.304599		0.787	0.018	0.0947	0.0018	0.78787	0.06038	0.00085		584	11	590	10	610	30		95.7377
TGB14A_87	273	0.447427		0.841	0.029	0.095	0.0032	0.60675	0.0637	0.0015		584	19	621	15	717	48		81.4505
TGB14A_6	571	0.438404		0.83	0.029	0.095	0.0027	0.61334	0.0625	0.0014		587	16	612	16	688	50		85.3198
TGB14A_76	45.6	0.68918		0.808	0.019	0.0961	0.0017	0.5438	0.0612	0.0013		591	10	600	11	640	46		92.3438
TGB14A_52	63.6	0.338983		0.882	0.038	0.0962	0.0022	0.72524	0.0652	0.0021		592	13	635	19	757	64		78.2034
TGB14A_44	146	0.261097		0.814	0.023	0.0968	0.0023	0.66006	0.0608	0.0014		595	14	605	13	624	50		95.3526
TGB14A_71	123.9	0.29146		0.847	0.025	0.097	0.0023	0.65782	0.0632	0.0015		596	13	624	14	722	44		82.5485
TGB14A_95	196	0.428816		0.811	0.02	0.0972	0.0021	0.76809	0.06027	0.00099		598	12	604	11	611	35		97.8723
TGB14A_3	240	0.269542		0.846	0.034	0.0977	0.0033	0.804	0.0621	0.0013		601	19	622	18	670	43		89.7015
TGB14A_63	123.8	0.306373		0.82	0.014	0.0978	0.0015	0.74616	0.06133	0.00072		601.2	8.9	608.4	7.7	656	25		91.6463
TGB14A_27	170	0.60241		0.813	0.018	0.0983	0.0022	0.91396	0.06052	0.00074		604	13	603.3	9.8	623	25		96.9502
TGB14A_18	191	0.507614		0.837	0.018	0.099	0.0016	0.75925	0.06099	0.00085		608.5	9.5	617.6	9.9	632	30		96.2816
TGB14A_67	246	0.253165		0.901	0.029	0.1004	0.004	0.89449	0.0648	0.0011		616	23	649	16	762	36		80.8399
TGB14A_22	162.8	0.414766		0.843	0.016	0.1007	0.0016	0.64274	0.061	0.00092		618.5	9.4	621	8.6	639	32		96.7919
TGB14A_75	132	0.636537		0.917	0.032	0.1018	0.0025	0.15475	0.0657	0.0025		624	15	658	17	748	52		83.4225
TGB14A_31	397	0.4329		0.852	0.016	0.1019	0.0019	0.7472	0.06039	0.00078		625	11	626.6	8.8	618	28		101.133
TGB14A_78	96	0.485437		0.904	0.029	0.1028	0.0024	0.74963	0.0638	0.0013		631	14	652	15	724	44		87.1547
TGB14A_65	82.2	0.163399		0.867	0.023	0.1029	0.0023	0.73969	0.0617	0.0011		632	13	634	12	658	39		96.0486
TGB14A_94	189	0.0983284		0.868	0.031	0.1033	0.0031	0.74388	0.0608	0.0012		633	18	634	16	629	44		100.636
TGB14A_74	371	0.326052		0.987	0.057	0.1036	0.0034	0.61116	0.0677	0.0026		635	20	692	27	843	82		75.3262
TGB14A_48	48.5	0.47824		0.88	0.026	0.1038	0.002	0.77618	0.0615	0.0012		636	12	641	14	660	43		96.3636
TGB14A_10	636	0.291545		0.887	0.029	0.1039	0.0029	0.79291	0.0608	0.0014		637	17	645	15	620	48		102.742
TGB14A_79	101.8	0.41841		0.865	0.021	0.1039	0.0023	0.8291	0.0602	0.00094		637	13	631	11	619	35		102.908
TGB14A_72	420	0.539957		0.905	0.025	0.1048	0.0026	0.76176	0.0623	0.0012		646	16	652	13	677	41		95.421
TGB14A_5	164	0.0980392		0.932	0.022	0.1068	0.002	0.731	0.06306	0.00093		654	12	667	11	708	31		92.3729
TGB14A_93	376	0.42735		0.935	0.034	0.107	0.0043	0.76327	0.0626	0.0015		655	25	668	18	686	52		95.481
TGB14A_14	82.9	0.770416		0.967	0.033	0.1089	0.0033	0.73131	0.0641	0.0016		666	19	684	17	731	51		91.1081
TGB14A_36	188	0.465766		0.937	0.021	0.1093	0.002	0.73048	0.062	0.0011		670	12	670	11	669	36		100.149
TGB14A_46	107	0.207383		0.964	0.017	0.1121	0.0017	0.66969	0.06207	0.0007		684.6	9.8	684.5	8.6	672	24		101.875
TGB14A_55	110	0.202429		1.06	0.11	0.1127	0.0077	0.82372	0.0643	0.0017		686	43	691	32	734	53		93.4605
TGB14A_80	81.3	0.631712		0.988	0.033	0.1126	0.0035	0.76035	0.0644	0.0013		687	20	697	17	753	39		91.2351
TGB14A_83	423	0.479386		0.995	0.067	0.1129	0.006	0.7906	0.0655	0.0027		688	35	709	35	772	84		89.1192
TGB14A_23	95.6	0.330251		1.034	0.018	0.1183	0.0017	0.65873	0.06377	0.00088		720	10	721	9	737	29		97.6934
TGB14A_53	270	0.0686342		1.157	0.021	0.1275	0.0021	0.71899	0.06529	0.00085		773	12	779.2	9.6	784	28		98.5969
TGB14A_77	455	0.0483092		1.167	0.03	0.1283	0.0029	0.76872	0.0653	0.001		778	17	784	14	783	34		99.3614
TGB14A_34	311	0.168919		1.683	0.041	0.1592	0.0039	0.84125	0.0753	0.0011		952	22	1003	15	1072	29		88.806
TGB14A_43	251	0.165289		1.671	0.091	0.1666	0.0073	0.83803	0.0719	0.0023		992	40	996	36	991	64		100.101
TGB14A_54	164	0.221239		1.757	0.06	0.1682	0.0051	0.84497	0.0741	0.0011		1001	28	1034	22	1042	32		96.0653
TGB14A_50	68.9	0.220604		1.76	0.038	0.1705	0.0027	0.66396	0.075	0.0012		1014	15	1028	14	1061	31		95.5702
TGB14A_40	175.4	0.238663		1.794	0.035	0.1748	0.0032	0.82348	0.07396	0.0008		1038	17	1041	13	1039	22		99.9038
TGB14A_25	292	0.285714		1.818	0.027	0.1788	0.0022	0.7994	0.07387	0.00057		1060	12	1051.2	9.8	1037	16		102.218
TGB14A_59	6.68	0.00555556		2.56	0.17	0.1886	0.0045	0.51056	0.0961	0.0052		1113	24	1255	42	1481	93		75.1519
TGB14A_85	246	0.202429		2.206	0.06	0.1903	0.0058	0.94611	0.08396	0.00084		1125	32	1183	19	1297	19		86.7386
TGB14A_96	113.4	0.255754		2.217	0.041	0.1972	0.0033	0.75143	0.0812	0.0011		1162	18	1186	13	1224	26		94.9346
TGB14A_9	87.5	0.276243		2.296	0.044	0.2039	0.0037	0.69604	0.0809	0.0011		1195	20	1209	14	1218	29		98.1117
TGB14A_32	174	0.324675		2.266	0.045	0.2077	0.0044	0.83405	0.07947	0.00096		1215	23	1200	14	1182	24		102.792
TGB14A_86	77.6	0.321543		2.484	0.064	0.2105	0.0049	0.72089	0.0847	0.0014		1231	26	1266	18	1306	31		94.2573
TGB14A_26	170	0.249813		2.377	0.032	0.2111	0.0026	0.80351	0.08204	0.00069		1235	14	1235.7	9.8	1246	16		99.1172
TGB14A_88	78	0.21322		2.46	0.084	0.2177	0.0068	0.91951	0.0809	0.0012		1268	35	1257	24	1214	30		104.448
TGB14A_30	142	0.322581		3.24	0.17	0.226	0.011	0.89977	0.1033	0.0016		1307	60	1460	43	1680	28		77.7976
TGB14A_61	140.2	0.555556		3.57	0.11	0.262	0.007	0.73592	0.0983	0.0022		1502	35	1545	25	1578	41		95.1838
TGB14A_73	73	0.342466		4.69	0.28	0.2651	0.0077	0.50398	0.1281	0.0068		1514	39	1746	48	2048	94		73.9258
TGB14A_91	469	0.297619		4.67	0.25	0.272	0.015	0.96601	0.1234	0.0014		1554	75	1748	44	2002	21		77.6224
TGB14A_56	264	0.182815		3.668	0.066	0.2738	0.0042	0.81131	0.096	0.0011		1560	21	1562	14	1549	20		100.71
TGB14A_64	550	0.115473		4.28	0.16	0.2893	0.008	0.75673	0.107	0.0022		1642	39	1687	30	1755	35		93.5613
TGB14A_60	248	0.223714		4.382	0.086	0.2972	0.0052	0.88298	0.1064	0.0011		1679	26	1710	16	1738	20		96.6053
TGB14A_35	161	0.476872		4.58	0.11	0.3019	0.0076	0.6551	0.1095	0.0021		1699	38	1746	21	1796	33		94.5991
TGB14A_16	56.9	0.483092		5.14	0.11	0.3223	0.0067	0.77833	0.1161	0.0015		1799	33	1849	19	1895	24		94.934
TGB14A_49	192	0.278552		5.55	0.15	0.333	0.0083	0.92667	0.1204	0.0011		1850	40	1905	23	1960	16		94.3878
TGB14A_24	129	0.243309		6.88	0.24	0.3339	0.0098	0.90367	0.1495	0.0022		1855	47	2090	32	2338	25		79.3413
TGB14A_28	73.8	0.374392		5.47	0.12	0.3371	0.0074	0.90884	0.1169	0.0013		1871	35	1892	19	1906	20		98.1637
TGB14A_21	284.2	0.289017		5.407	0.083	0.3379	0.0049	0.84825	0.1169	0.0012		1875	24	1884	13	1907	18		98.322
TGB14A_12	197	0.319489		5.94	0.25	0.352	0.013	0.64874	0.1239	0.0038		1941	63	1962	36	2004	54		96.8563
TGB14A_98	157	0.684932		6.48	0.44	0.35	0.021	0.72188	0.1271	0.0063		1950	110	2025	61	2048	85		95.2148
TGB14A_58	113.7	0.327547		6.42	0.19	0.3569	0.0087	0.77197	0.1293	0.0025		1975	43	2032	26	2094	33		94.3171
TGB14A_57	23.9	0.383436		6.08	0.14	0.3621	0.0078	0.69584	0.1199	0.002		1994	37	1988	20	1951	30		102.204
TGB14A_62	43.7	0.24108		6.43	0.15	0.363	0.0066	0.8181	0.1275	0.0018		1994	31	2033	20	2067	25		96.4683
TGB14A_51	146	0.430478		6.33	0.11	0.368	0.0063	0.77826	0.1246	0.0015		2018	30	2020	15	2024	21		99.7036
TGB14A_4	328	0.251256		6.72	0.11	0.3692	0.0057	0.78669	0.1316	0.0014		2024	27	2076	14	2122	19		95.3817
TGB14A_8	154.2	0.401606		6.54	0.14	0.3818	0.0068	0.79509	0.1235	0.0015		2083	31	2055	19	2006	22		103.838
TGB14A_19	301	0.337838		8.76	0.52	0.401	0.02	0.96702	0.1582	0.0021		2179	91	2323	51	2437	23		89.4132
TGB14A_45	79.3	0.161812		7.4	0.12	0.4037	0.0069	0.91501	0.1334	0.0011		2189	32	2163	16	2141	15		102.242
TGB14A_2	17.4	2.09644		0.422	0.052	0.0454	0.0012	0.60655	0.0663	0.0075		286	7.6	347	33	620	170		46.129
TGB14A_7	306	0.292141		0.828	0.069	0.0769	0.0035	0.82818	0.0741	0.0034		477	21	606	37	1018	90		46.8566
TGB14A_33	1600	0.094697		1.04	0.14	0.077	0.0084	0.98363	0.0952	0.0039		476	50	704	69	1529	76		31.1315
